# Supplementary material for: Geographical Inequalities and Social and Environmental Risk Factors for Under-Five Mortality in Ghana in 2000 and 2010: Bayesian Spatial Analysis of Census Data
Source: PLoS Med. 2016 Jun 21;13(6):e1002038. doi: 10.1371/journal.pmed.1002038 (PMC4915620; doi:10.1371/journal.pmed.1002038)
Supplement: S2 Data — (XLSX) [file pmed.1002038.s002.xlsx]

## Sheet: Dataset2
	Census 2000															Census 2010
	% of Households: fuel use, sanitation, drinking water and urban									% of Mothers/Fathers: education						% of Households: fuel use, sanitation, drinking water and urban									% of Mothers/Fathers: education
DISTID	Other Biomass	Electricity	Kerosene	Gas (LPG)	Charcoal	Wood	Improved Sanitation Facility	Improved Drinking Water	Urban Household	No Education, Mothers	Primary Education, Mothers	Secondary Education, Mothers	No Education, Fathers	Primary Education, Fathers	Secondary Education, Fathers	Other Biomass	Electricity	Kerosene	Gas (LPG)	Charcoal	Wood	Improved Sanitation Facility	Improved Drinking Water	Urban Household	No Education, Mothers	Primary Education, Mothers	Secondary Education, Mothers	No Education, Fathers	Primary Education, Fathers	Secondary Education, Fathers
101	10.5834	0.316599	1.35685	1.53777	16.8702	69.3351	33.1072	35.3234	31.6599	61.1593	27.421	11.4196	36.9139	39.6081	23.478	6.95854	0.0579878	0.289939	10.2638	23.5431	58.8866	62.3949	76.6599	37.6631	41.0866	46.0441	12.8693	21.4716	53.5742	24.9542
102	3.81628	0.337724	1.68862	1.21581	19.9932	72.9483	34.9544	31.4421	28.2675	54.2506	32.4944	13.255	34.9248	41.956	23.1192	5.2796	0.249922	0.468604	8.18494	26.9916	58.8254	76.7885	64.5111	27.8351	37.1312	48.7792	14.0895	21.2211	55.8096	22.9693
103	5.12931	0.431034	0.991379	1.37931	23.8362	68.2328	37.9741	52.2845	20	53.9855	35.9501	10.0644	31.8701	48.2441	19.8859	6.19977	0.153081	0.267891	8.84041	35.8209	48.7179	68.0827	70.532	29.5446	33.4388	53.3404	13.2208	16.5815	60.7859	22.6326
104	6.1907	2.98542	2.22171	11.097	60.9928	16.5124	73.1891	89.6089	100	31.3437	42.0208	26.6355	19.4968	44.3171	36.1861	6.48458	1.21392	0.687477	33.9589	48.8728	8.78236	93.887	90.1028	91.4778	14.9268	50.0158	35.0574	6.09538	47.8346	46.07
105	6.27063	0.206271	1.48515	1.07261	9.65347	81.3119	43.0281	45.9158	13.9026	53.7879	33.0234	13.1887	35.7745	43.3571	20.8684	6.2603	0.263591	0.197694	5.33773	15.9143	72.0264	90.2142	65.4036	15.4201	32.6329	58.9308	8.43634	14.7302	67.8413	17.4286
106	4.63119	2.40896	1.49393	3.64146	38.5808	49.2437	52.2316	57.0868	35.6863	42.1486	43.4338	14.4175	21.4117	54.0953	24.493	8.11759	1.08569	0.317354	12.3601	37.715	40.4042	93.2855	67.1121	34.8923	27.2034	59.81	12.9866	14.8061	63.4254	21.7685
107	2.69086	0.229453	0.980392	0.479766	7.00876	88.6108	39.0905	41.1556	14.7476	56.045	36.4872	7.46783	34.5482	49.1609	16.2909	4.93642	0.224383	0.26178	4.86163	17.6889	72.0269	90.258	57.9656	22.4009	35.0672	53.8412	11.0915	22.1758	59.4862	18.338
108	1.0352	0.0828157	1.28364	0.621118	7.03934	89.9379	29.7308	25.383	16.7288	64.0506	28.9693	6.98011	43.3303	41.9197	14.7501	4.94758	0.0982962	0.163827	3.70249	13.5321	77.5557	83.0275	42.9554	16.2844	48.5812	41.4869	9.9319	34.6609	49.5156	15.8235
109	5.90248	1.06929	1.26176	6.37297	3.20787	82.1856	33.0197	28.5073	7.12147	65.5062	27.9196	6.57428	46.8306	39.5022	13.6673	4.11014	0.101235	0.222717	3.0573	11.5206	80.9881	90.5649	57.0763	14.5171	41.4443	48.7992	9.7565	27.8098	54.723	17.4672
110	2.16729	0.270911	0.914324	1.01592	8.26278	87.3688	39.2482	34.5073	25.6349	56.346	34.8693	8.78469	36.7624	47.5115	15.726	4.60207	0.168883	0.168883	6.05869	15.685	73.3164	88.1782	66.4556	27.8868	39.7705	48.8438	11.3857	25.7896	54.7543	19.4562
111	3.66235	1.07191	0.893256	1.29522	17.5525	75.5248	51.3622	41.2238	40.1519	47.3964	41.049	11.5545	28.0922	50.0404	21.8674	5.76296	0.28996	0.253715	9.67742	19.1011	64.9148	86.0457	89.2715	30.3008	28.8508	56.3177	14.8315	15.3308	58.0153	26.6539
201	4.98697	0.669892	1.6003	2.64235	41.6822	48.4183	52.0655	79.6055	29.6241	49.2695	36.8671	13.8634	30.4245	47.2091	22.3664	5.77086	0.282885	0.792079	8.65629	49.3635	35.1344	80.5092	92.3055	37.3975	31.0363	55.102	13.8616	17.0919	58.5306	24.3775
202	5.82169	2.72788	3.59281	12.475	63.5729	11.8097	75.9481	98.1371	67.7312	27.1429	38.9504	33.9067	12.7862	39.7543	47.4595	5.79208	0.420792	0.49505	32.0545	57.9208	3.31683	90.8168	84.4802	75.2475	12.9076	48.3472	38.7452	6.80496	46.6987	46.4963
203	4.50089	0.40107	1.73797	1.47059	28.6542	63.2353	46.4795	85.918	29.902	57.322	33.0497	9.6283	36.3275	47.527	16.1455	5.36332	0.380623	0.346021	5.36332	38.7197	49.827	76.3322	89.8616	34.3945	33.8772	54.9584	11.1644	18.6472	60.2392	21.1136
204	4.94505	0.906593	1.86813	1.8956	48.544	41.8407	43.3516	77.0055	48.7088	51.8583	37.2662	10.8755	31.7215	49.3553	18.9233	4.85679	0.249066	0.850976	8.80033	54.7945	30.4483	77.8539	84.8692	51.2868	29.5266	56.7343	13.7391	15.9798	60.617	23.4032
205	3.51633	0.476407	1.86025	1.88294	25.726	66.5381	46.2568	69.6234	23.3212	52.299	33.1693	14.5317	27.0012	47.7601	25.2387	5.29764	0.384506	1.12504	20.0085	48.1914	24.9929	81.8285	71.689	62.7599	24.1336	54.767	21.0994	9.82805	56.6261	33.5458
206	3.48034	0.557917	1.88629	5.3932	44.4474	44.2349	48.7248	49.4687	67.2689	51.478	34.565	13.9569	32.8827	42.3225	24.7948	5.63472	0.237478	0.539724	22.69	44.3005	26.5976	84.6934	57.5777	74.4387	25.4766	55.514	19.0094	11.1269	59.5606	29.3124
207	6.93524	0.586435	1.65732	3.56961	24.7578	62.4936	59.383	83.3248	67.797	43.331	43.8378	12.8311	22.9526	55.2725	21.7749	6.74202	0.158636	0.75352	12.6512	31.866	47.8287	90.8586	83.8786	64.9018	22.6275	61.3682	16.0044	10.0297	64.9384	25.0319
208	3.62173	0.452716	1.10664	0.653923	8.85312	85.3119	58.4507	55.6841	33.2495	46.0854	43.5053	10.4093	25.7895	58.1053	16.1053	5.56579	0.221157	0.294877	5.45522	15.0756	73.3874	92.7755	74.3457	50.5345	27.5353	62.1222	10.3425	11.5004	68.5903	19.9093
209	4.99313	0.229043	0.824553	0.961979	10.9482	82.0431	53.0463	63.9487	17.3614	49.4596	40.9425	9.59792	27.4792	53.4072	19.1136	5.06572	0.191995	0.354453	5.44971	27.0566	61.8816	76.7243	72.8548	36.8483	31.5413	57.3957	11.0631	15.1184	65.1363	19.7453
210	2.92265	0.352734	1.18418	0.982615	9.549	85.0088	37.3394	50.9196	16.0242	48.9988	39.436	11.5652	27.333	52.2556	20.4113	4.62418	0.168152	0.235413	6.62519	18.379	69.9681	85.7071	75.8366	22.9696	26.5279	61.2049	12.2672	12.7676	65.0727	22.1597
211	3.35928	0.573535	1.06514	1.47481	9.70914	83.8181	33.0602	56.2474	15.6493	45.8558	44.4923	9.65196	21.6175	60.4686	17.9138	4.45328	0.397614	0.198807	7.833	21.9085	65.2087	87.833	78.7674	26.839	31.3187	57.1105	11.5708	16.9785	64.9688	18.0527
212	3.53945	0.852878	1.27932	1.32196	18.1237	74.8827	44.6055	75.0959	26.4819	45.4443	42.3193	12.2364	26.0937	53.2327	20.6736	6.21366	0.109012	0.472384	9.6657	21.548	61.9913	87.6453	81.686	24.4913	28.1694	58.3728	13.4578	15.8304	60.8997	23.2699
301	6.67964	2.93553	4.94737	21.8918	62.071	1.47462	67.9997	91.8375	100	23.14	43.2705	33.5895	14.1527	41.127	44.7203	9.67903	1.35881	1.53812	40.6647	45.7353	1.02409	92.9151	70.2875	100	13.0627	50.9632	35.9741	5.97057	45.6038	48.4256
302	4.96138	1.02418	4.13868	19.5013	49.043	21.3314	42.3522	64.1202	71.9023	27.276	43.7153	29.0087	13.589	47.0498	39.3611	4.56089	0.345032	0.95962	40.4281	47.5875	6.11893	89.3903	55.3237	82.1176	12.2257	52.2601	35.5141	5.53682	47.7515	46.7116
303	4.35815	1.84201	2.53513	28.1808	58.6213	4.46259	60.8621	87.4953	88.5587	25.8077	42.9467	31.2456	14.6059	44.2162	41.1779	6.23731	0.52457	0.781779	47.675	42.9031	1.8783	88.3545	67.3887	93.7187	11.9482	52.2926	35.7592	4.93378	47.1976	47.8686
304	2.12303	0.653239	1.68753	3.15732	38.9766	53.4023	23.3533	64.9973	26.1296	52.8942	34.8902	12.2156	35.3142	43.2664	21.4194	4.71876	0.302001	0.641752	17.365	49.5281	27.4443	54.3224	79.3884	38.0143	32.0404	53.9439	14.0156	18.4123	56.6703	24.9173
305	3.02511	0.342466	1.99772	1.94064	39.4977	53.1963	21.9178	28.3676	22.3744	53.0977	34.1788	12.7235	28.6853	43.6753	27.6394	4.91022	0.403078	0.806156	10.59	53.9392	29.3514	52.6567	73.2503	33.712	36.9724	50.3015	12.7261	16.8869	61.417	21.696
401	2.38596	0.140351	1.47368	1.82456	22.0351	72.1404	24.0702	38.9474	12.7719	47.6796	39.6058	12.7146	23.8267	47.9422	28.231	3.0837	0.0978953	0.342633	7.24425	28.928	60.3035	66.8625	69.3588	14.8311	28.4014	59.5238	12.0748	10.8402	65.0934	24.0664
402	3.20534	0.33389	2.13689	2.40401	35.3255	56.5943	36.2938	42.8715	54.4908	47.7219	37.0118	15.2663	25.3272	44.8953	29.7775	3.5148	0.0528541	1.24207	12.5264	40.9619	41.7019	53.9905	82.9017	54.4133	28.0899	57.7186	14.1915	10.9766	64.5652	24.4582
403	5.0267	0.220954	2.3016	1.19683	33.9716	57.2823	23.1449	28.6135	35.8498	56.9991	31.1891	11.8119	28.1879	47.2675	24.5446	1.94795	0.106529	0.837011	9.46583	40.8309	46.8117	68.7871	61.5279	42.0636	36.3463	51.7602	11.8934	14.8831	63.4441	21.6728
404	1.26638	0.131004	1.57205	0.786026	16.6376	79.607	25.3275	24.0175	20.524	57.7617	29.2419	12.9964	31.2823	44.8567	23.861	3.17979	0.148588	0.267459	6.24071	26.3893	63.7741	79.9108	64.5171	25.4681	35.3038	53.5606	11.1356	14.6998	63.7336	21.5666
405	0.945724	0.534539	1.02796	0.699013	16.1184	80.6743	30.6332	41.0773	19.8602	47.7638	37.0126	15.2236	28.0668	44.0591	27.8741	3.41962	0.255673	0.607223	4.15468	28.156	63.4068	67.7533	57.3985	30.457	31.0553	55.7353	13.2094	14.9699	62.7805	22.2496
406	2.55366	0.573649	1.68394	4.75574	26.0918	64.3412	42.6906	55.0148	35.7883	24.3048	51.3302	24.3649	14.8991	50.7355	34.3654	3.48196	0.206849	0.551597	20.4091	28.3498	47.0007	80.6137	80.4068	41.2434	13.1187	60.7653	26.116	7.03632	57.9756	34.988
407	2.05592	0.411184	1.02796	1.97368	20.477	74.0543	46.2582	66.5707	20.6414	22.6008	57.643	19.7562	13.5125	53.9028	32.5847	3.60061	0.257186	0.453858	10.0605	31.6339	53.9939	87.7005	71.9213	41.4372	12.0092	66.0508	21.94	6.99923	61.5042	31.4965
408	1.60237	0.326409	0.949555	2.84866	18.0119	76.2611	40.9792	48.2196	22.1662	24.2578	53.2947	22.4475	16.1542	51.3809	32.4648	3.67991	0.233645	0.321262	8.52804	34.229	53.0082	82.7687	74.9416	33.4988	15.423	65.3705	19.2065	10.1081	62.0508	27.8411
409	2.32158	0.429923	1.1178	0.601892	10.7051	84.8237	31.9862	49.0112	21.3242	39.2324	46.7662	14.0014	24.202	51.3855	24.4125	3.99864	0.0677736	0.203321	4.30363	24.3646	67.062	80.6845	71.2979	30.9048	28.4011	60.2262	11.3727	17.2976	61.9267	20.7756
410	1.5015	0.3003	1.001	0.500501	11.4114	85.2853	22.2222	37.3373	18.8188	51.2722	38.0108	10.717	25.8895	52.7631	21.3475	5.01139	0.0759301	0.15186	4.17616	19.0585	71.5262	82.9916	74.8671	28.9294	32.8145	56.8742	10.3113	15.9373	63.9451	20.1176
411	1.21065	0.121065	0.928168	0.282486	11.3801	86.0775	11.2591	12.9944	27.0379	75.2511	16.769	7.97991	62.3061	22.5929	15.101	2.50841	0.275314	0.0917712	2.20251	18.0177	76.9043	41.9394	66.3812	30.7739	66.689	26.9703	6.3407	48.8724	36.7562	14.3714
412	1.28116	0.34626	1.14266	0.277008	10.7341	86.2188	14.8546	26.9044	21.2258	71.9978	19.6823	8.31987	58.5631	26.9416	14.4953	2.84553	0.112918	0.451671	1.73893	19.8058	75.0452	49.0515	57.0461	27.0099	58.6744	34.2524	7.07313	45.0443	40.2641	14.6916
501	4.0408	0.156924	1.33386	0.941546	4.74696	88.7799	42.3303	67.399	9.80777	45.515	44.1528	10.3322	24.3195	55.8501	19.8303	5.98398	0.225338	0.450676	5.00751	17.6014	70.7311	82.9745	91.312	32.0981	22.0047	68.1209	9.87444	11.2745	70.1214	18.6041
502	4.62757	0.74239	1.58377	2.3509	19.4754	71.22	48.1564	53.9965	51.7446	40.1194	45.3421	14.5385	21.1768	55.6217	23.2015	7.74529	0.306138	0.489821	12.567	27.2616	51.6302	90.9995	79.6418	60.9062	19.59	64.2547	16.1553	9.98732	66.2175	23.7952
503	2.97354	0.237883	1.4273	1.72465	15.8192	77.8174	45.4951	28.7244	36.0095	46.3894	41.1355	12.4751	25.5649	54.0462	20.3889	4.92295	0.214041	0.684932	9.16096	28.8955	56.1216	89.2765	64.5334	42.4015	24.4549	63.2519	12.2932	12.5132	68.1904	19.2964
504	6.22506	0.957702	1.99521	1.75579	20.1649	68.9013	38.8135	55.4669	42.0325	41.3747	45.0123	13.613	26.8856	51.9703	21.1441	6.57592	0.52356	0.691099	10.1571	31.9791	50.0733	89.0681	87.3927	50.8272	18.4885	67.1504	14.3611	9.17093	66.8373	23.9918
505	3.29419	0.343741	2.00516	2.32025	14.4085	77.6282	35.5199	33.7153	25.4655	38.0669	50.6413	11.2918	21.0513	59.2859	19.6628	4.39097	0.297693	0.818655	7.86405	24.8574	61.7713	91.9375	61.3743	29.5708	20.0225	69.6288	10.3487	8.6715	73.8647	17.4638
506	4.01711	0.570478	1.64012	3.04255	10.6251	80.1046	38.8638	48.7283	38.9826	29.4885	55.0642	15.4473	17.1156	56.6464	26.2381	5.59625	0.278347	0.673894	12.2619	26.3405	54.8491	91.005	77.7762	50.9083	13.8425	69.5149	16.6426	7.34717	66.7695	25.8833
507	1.60754	0.498891	1.16408	1.21951	6.20843	89.3016	30.3769	25.3326	20.8426	48.3618	39.9169	11.7213	31.9494	49.7722	18.2785	3.33615	0.126689	0.591216	7.43243	20.1858	68.3277	90.7095	48.2686	30.2787	25.3343	62.2696	12.3961	16.3072	65.5694	18.1233
508	6.76977	0.437701	3.29734	12.9268	52.6408	23.9276	62.9413	71.8413	85.2933	18.8602	54.5762	26.5636	10.5834	49.4837	39.9329	7.29293	0.424242	0.828283	32.6869	48.6061	10.1616	96.303	77.2525	93.9596	8.69328	56.5336	34.7731	4.05244	49.7616	46.1859
509	2.91829	0.466926	2.45136	7.54864	32.4514	54.1634	42.3735	56.0311	48.5992	35.7346	45.2133	19.0521	22.8851	49.1405	27.9744	5.51387	0.391517	1.2398	21.5334	40.9462	30.3752	90.8646	73.4095	50.4078	15.9333	62.5827	21.484	6.35659	61.2713	32.3721
510	3.09494	0.460059	1.67294	5.85529	24.2995	64.6173	44.9184	55.8762	32.3714	31.7411	49.4635	18.7954	18.0008	54.7989	27.2003	2.83218	0.331425	0.482073	16.6616	38.7165	40.9762	93.0099	71.7686	36.3362	14.9246	62.9796	22.0958	7.77139	62.3223	29.9063
511	2.02559	0.319829	1.1194	1.75906	31.3966	63.3795	34.7548	45.7889	20.7356	48.5567	38.561	12.8824	24.5326	52.9412	22.5262	3.04201	0.289715	0.627716	9.07774	43.747	43.2158	94.7851	67.6002	34.7175	25.7454	59.3876	14.867	10.5171	65.2498	24.2331
512	1.4063	1.46744	1.13115	1.89544	37.5726	56.5271	31.7334	57.9639	43.7787	52.7164	35.1278	12.1558	28.7168	48.4061	22.877	2.63088	0.664364	0.398618	8.13181	47.9139	40.2604	93.941	79.3516	56.0457	29.9731	56.0844	13.9425	14.2411	62.8722	22.8866
513	1.58358	6.92082	0.879765	3.46041	26.217	60.9384	41.9941	52.434	24.7507	33.4778	49.1329	17.3892	15.8909	53.0765	31.0326	3.41734	6.06578	0.341734	10.551	39.2567	40.3674	85.1773	85.2627	29.7736	18.9109	61.4323	19.6568	7.97257	59.7085	32.3189
514	1.44173	0.0800961	0.440529	0.360432	8.1698	89.5074	20.5046	46.7761	6.52783	65.2451	28.5169	6.23806	50.0831	35.5125	14.4044	3.58306	0.347448	0.390879	2.10641	21.0858	72.4864	54.1368	49.2725	21.7372	48.3098	45.4124	6.27777	39.0007	48.8233	12.176
515	2.49947	0.384533	1.08951	2.90536	22.8584	70.2628	43.3241	44.3922	39.9487	37.6414	47.7285	14.6301	24.6622	51.6636	23.6741	5.97854	0.255493	0.647249	10.6966	34.713	47.7091	86.9869	67.5183	40.2487	18.106	65.8118	16.0822	10.8645	66.2879	22.8475
601	3.26812	0.460299	1.42693	1.91024	20.7365	72.1979	58.1588	58.8493	21.0127	45.5548	41.803	12.6422	31.4897	49.0582	19.4521	6.00586	0.211589	0.309245	11.849	33.1543	48.4701	92.9199	87.9557	24.0234	23.7548	59.9891	16.2562	14.872	60.4748	24.6532
602	2.89179	0.51306	1.21269	2.14552	1.58582	91.6511	56.7631	73.2276	0	57.4746	37.8447	4.6807	31.8577	54.1107	14.0316	7.27891	0.0680272	0.170068	3.40136	14.8639	74.2177	77.9932	95.5782	4.82993	29.5808	61.5069	8.91234	17.5858	63.6747	18.7394
603	2.74262	0.21097	1.50023	1.17206	6.16503	88.2091	64.7211	61.4862	12.6582	48.9217	40.8059	10.2724	33.2513	49.2923	17.4564	4.97818	0.27477	0.210118	6.3197	14.9184	73.2989	91.967	91.9832	12.397	26.4459	61.6314	11.9227	14.6091	65.2111	20.1798
604	4.57097	5.85405	1.42342	3.96953	48.1155	36.0666	65.6776	64.3945	62.0489	38.4154	45.3441	16.2405	23.7181	51.7174	24.5645	7.05738	4.95551	0.368211	19.9141	38.3707	29.3342	94.1393	84.9801	61.1077	19.3763	58.3667	22.257	9.36381	57.5048	33.1314
605	1.46997	0.0839983	1.34397	0.755985	5.66989	90.6762	45.1491	38.0512	8.10584	54.7695	38.2843	6.94622	31.7471	54.9496	13.3032	4.68201	0.11705	0.234101	3.55053	15.3336	76.0827	93.9524	78.2677	18.9622	32.0672	59.6303	8.30252	16.6909	67.0174	16.2917
606	2.89017	0.262743	2.15449	0.525486	4.57173	89.5954	47.9243	43.2475	17.6038	44.9043	45.5719	9.52381	29.9515	54.0803	15.9682	5.00189	0.265252	0.265252	5.22925	15.7257	73.5127	89.4278	88.5942	17.9235	23.1597	67.4286	9.41176	13.5877	68.117	18.2953
607	7.00304	0.521966	0.826446	2.82732	17.4859	71.3354	65.6807	54.8499	56.0679	34.5472	48.3081	17.1447	31.7594	46.119	22.1216	8.933	0.217122	0.372208	12.531	31.7928	46.1538	91.005	90.6948	58.8089	17.8635	64.2729	17.8635	11.8283	63.4346	24.7371
608	4.90011	0.301545	1.54542	3.01545	17.9796	72.2578	67.8854	51.4135	26.7622	36.7266	48.5827	14.6906	21.8255	54.4291	23.7454	6.18182	0.30303	0.242424	14.7576	33.303	45.2121	93.0606	92.6667	29.2121	16.6047	63.7423	19.653	8.39827	62.1934	29.4084
609	4.02762	0.652091	1.53433	1.34254	15.3817	77.0618	70.234	63.9816	5.63867	43.3352	44.5938	12.0709	26.738	51.3072	21.9548	7.33272	0.297892	0.366636	14.6196	39.9175	37.4656	90.7883	92.8048	26.077	16.2999	65.3359	18.3642	8.0373	65.3419	26.6208
610	9.56101	2.70212	2.05896	10.4804	71.3083	3.88915	73.6522	85.2592	100	29.877	45.7712	24.3518	20.6421	46.2047	33.1533	11.0754	0.669046	0.499347	34.215	52.0705	1.47073	96.766	93.9669	100	14.4468	53.549	32.0042	6.69345	50.1336	43.1729
611	7.14517	0.61429	1.71355	2.10152	39.2176	49.2079	66.02	55.6094	38.4416	36.9949	49.697	13.3081	26.1163	51.4019	22.4818	7.66983	0.328707	0.36523	18.1154	59.9708	13.55	92.5128	93.7546	58.4003	15.3119	62.755	21.9332	6.63248	59.1795	34.188
612	4.84088	0.493052	1.29987	1.21022	7.08203	85.074	64.052	42.8059	35.9928	41.1509	48.8792	9.96989	25.2896	53.5521	21.1583	7.86266	0.325071	0.304754	10.8899	38.2162	42.4015	90.2885	89.4758	38.0333	17.4984	64.0435	18.4581	10.3157	62.6652	27.0191
613	4.60772	0.373599	1.4944	0.83022	9.423	83.2711	58.8626	50.1038	34.7862	46.0991	42.2723	11.6286	42.5022	39.7862	17.7116	6.26703	0.242204	0.27248	6.78171	21.8589	64.5777	81.4108	63.3364	43.6876	25.1906	61.7692	13.0402	21.0119	57.5339	21.4542
614	5.15695	0.523169	1.64425	1.08371	21.0762	70.5157	62.4439	48.7294	43.2362	43.8491	43.1607	12.9901	37.021	42.6143	20.3646	6.37415	0.148236	0.296472	5.69226	29.0543	58.4346	84.2573	66.7358	42.2473	28.0627	57.3124	14.6249	22.5703	54.1098	23.3199
615	3.31687	0.564573	1.05857	0.635145	31.6161	62.8088	57.3042	64.9259	51.1644	66.0387	24.8038	9.15751	52.8431	31.3725	15.7843	6.28816	0.549451	0.18315	4.21245	40.8425	47.9243	71.8559	88.2173	52.9915	45.8797	41.8708	12.2494	33.5913	46.7456	19.6632
616	4.05889	0.51731	1.51214	0.756068	11.9777	81.1779	56.8643	59.4509	31.4763	52.0942	38.8016	9.10413	38.3249	43.9775	17.6975	6.84211	0.18797	0.037594	5.15038	25.9398	61.8421	89.8496	82.0677	36.6541	36.4686	51.929	11.6024	28.2233	52.4368	19.3399
617	4.22535	0.0521648	1.66927	0.521648	3.8602	89.6714	66.771	60.4591	9.96348	56.9837	32.1694	10.847	47.2281	37.7193	15.0526	4.75836	0.334572	0.185874	3.0855	11.4126	80.223	93.4944	78.8104	10.4089	33.9255	59.3099	6.76461	20.9165	65.4337	13.6498
618	1.83413	0.398724	1.67464	0.318979	10.6061	85.1675	51.1962	58.5327	21.8501	51.5912	38.3109	10.0979	40.2388	41.7313	18.0299	6.3243	0.285307	0.0951022	5.37328	15.5968	72.3252	94.7694	79.8859	22.8721	34.8376	53.9435	11.2189	23.8408	57.817	18.3422
701	2.72835	0.385528	1.18624	0.533808	9.72716	85.4389	45.6406	35.9431	31.465	49.7411	39.0382	11.2207	33.1994	47.1645	19.6361	5.44879	0.380148	0.105597	4.39282	17.5079	72.1647	88.5577	69.2539	33.7267	32.3419	56.7231	10.935	21.5779	58.4607	19.9613
702	3.31665	0.187735	0.750939	0.750939	5.13141	89.8623	57.8223	40.1126	17.5219	50.716	38.321	10.963	36.7893	45.0072	18.2035	5.55315	0.433839	0.260304	8.3731	23.7744	61.6052	90.7484	76.028	34.8684	31.3949	55.5476	13.0574	20.3684	56.2658	23.3658
703	3.85562	0.902379	1.06645	1.31255	9.18786	83.6751	58.0394	63.7818	46.4315	47.9734	38.0621	13.9645	35.1645	41.4474	23.3882	8.8105	0.173996	0.221449	18.9181	27.1591	44.7169	89.6228	82.23	65.3689	23.4744	51.623	24.9026	15.4155	50.277	34.3075
704	6.00949	1.63416	1.39694	6.87928	32.4196	51.6605	61.3337	73.0627	77.3063	34.002	41.6413	24.3566	25.1524	41.7513	33.0963	8.92043	0.35479	0.152053	12.9752	29.9037	47.6939	89.4966	83.7367	70.9584	20.8809	57.0555	22.0636	14.0909	53	32.9091
705	5.60688	0.0318573	0.923861	1.08315	6.18031	86.1739	57.8847	61.5483	33.2909	42.0474	46.7416	11.211	27.1159	53.4232	19.4609	7.58825	0.274783	0.0845487	6.53139	15.3245	70.1966	85.7955	80.0745	40.1254	24.2218	61.6091	14.1691	16.1124	59.4228	24.4648
706	4.37224	0.52146	1.08303	0.641797	8.42359	84.9579	53.3494	80.9467	32.852	53.096	34.4427	12.4613	32.2634	44.798	22.9386	7.16434	0.246103	0.0546896	5.66038	13.4537	73.4208	85.8991	90.6598	38.0078	30.9942	51.583	17.4229	16.2081	53.8035	29.9884
707	7.92515	0.660429	0.935608	2.47661	21.1888	66.8134	58.6131	77.5454	58.1178	39.8744	40.3061	19.8195	25.8651	44.3339	29.801	11.8611	0.417872	0.128576	11.8611	30.6011	45.1302	91.0802	92.8086	65.4321	18.1888	61.3456	20.4656	7.88878	56.45	35.6612
708	4.1926	0.524075	1.17917	0.458565	18.6047	75.0409	44.8739	63.8716	32.1978	61.7661	26.1068	12.127	47.9661	33.106	18.9278	8.51119	0.308563	0.179995	4.11417	22.4994	64.3867	67.9894	82.0469	39.3661	42.97	45.2427	11.7874	29.7191	49.2152	21.0657
709	3.72852	1.36906	0.961258	0.990387	33.9936	58.9572	59.598	55.4034	59.598	52.8166	33.8416	13.3418	41.2548	38.1918	20.5534	8.58586	0.16835	0.189394	8.48064	44.8232	37.7525	86.2306	82.8387	60.9328	31.1192	52.3817	16.4991	21.841	52.7025	25.4566
710	2.56518	0.462574	0.798991	0.294365	16.148	79.7309	49.3692	45.0799	30.6981	56.3305	33.9303	9.73924	45.7576	37.697	16.5455	6.19048	0.140056	0.168067	4.2577	20.5602	68.6835	69.5004	71.096	37.0128	39.2422	49.9098	10.848	29.8675	52.468	17.6645
711	1.90513	0.427683	1.28305	0.388802	19.7123	76.283	35.2644	20.7232	30.3655	69.4791	20.6214	9.89948	56.5301	27.1311	16.3388	5.94002	0.0865052	0.17301	3.63322	27.624	62.5433	52.0677	57.9753	37.0032	48.1044	42.3506	9.54505	35.3068	46.7156	17.9775
712	1.55797	0.144928	1.08696	0.471015	20.5072	76.2319	31.0145	33.2609	36.9565	74.3038	18.4304	7.26582	59.0474	25.1795	15.7731	4.16473	0.0930665	0.0930665	1.62866	32.7129	61.3076	46.8382	57.6973	42.8042	56.7814	34.0081	9.21053	41.7634	40.0139	18.2228
713	1.57143	0.142857	0.857143	0	6.42857	91	33.2143	50.4286	9.85714	76.9841	17.5132	5.50265	62.7068	24.1604	13.1328	2.77405	0.223714	0.268456	0.894855	12.4385	83.4004	51.7027	53.613	12.7076	59.9047	32.5732	7.52212	44.9704	41.3872	13.6423
801	1.67598	0.111732	1.28492	0.335195	7.87709	88.7151	10.2793	70.1676	15.7542	87.5497	6.45695	5.99338	75.6926	12.1537	12.1537	3.89043	0.198491	0.0793966	1.15125	16.0778	78.6026	15.084	73.6304	19.3207	73.2212	20.614	6.16472	58.7895	27.6571	13.5534
802	0.826446	0.243072	1.79874	0.43753	6.46573	90.2285	9.04229	23.335	16.8206	86.0118	6.43457	7.55362	76.9782	9.34579	13.676	2.30701	0.177462	0.221828	1.86335	11.2245	84.2059	11.8708	48.1593	24.568	74.6755	18.4924	6.83216	64.4312	22.9757	12.5931
803	0.756068	0.119379	0.915241	0.198965	6.52606	91.4843	11.1819	19.817	15.5591	84.3829	9.01473	6.60234	72.7678	14.2489	12.9834	2.47652	0.19926	0.512383	0.996299	12.1264	83.6892	15.1879	44.3876	15.8016	75.1101	19.6882	5.20163	62.5257	25.7025	11.7718
804	0.593632	0.323799	1.2952	0.107933	2.42849	95.2509	7.39342	43.9288	20.0216	89.175	4.4763	6.34874	74.7401	9.02141	16.2385	1.79704	0.422833	0.634249	1.05708	6.02537	90.0634	11.5666	61.2011	23.1649	77.1183	16.035	6.84662	61.9075	22.1834	15.9091
805	0.498504	0.199402	0.598205	0.199402	2.89133	95.6132	8.47458	50.8475	21.4357	92.235	3.98741	3.77754	81.0098	8.66322	10.327	1.62963	0.296296	0.148148	0.740741	4.88889	92.2963	20.52	75.4041	21.0822	76.1559	17.6684	6.17569	64.4973	22.4132	13.0896
806	0.498339	0.166113	2.32558	0.249169	3.73754	93.0233	7.89037	28.5714	6.72757	87.4765	5.81614	6.70732	77.4458	7.80723	14.747	1.97044	0.123153	0.123153	0.67734	8.37438	88.7315	10.9441	58.2682	14.8527	78.3473	16.4226	5.23013	61.9518	24.0221	14.0261
807	2.03692	0.318269	1.01846	0.127307	7.89306	88.606	22.979	66.3908	35.2642	88.2598	5.88612	5.85413	70.637	11.9111	17.4519	1.84928	0.138696	0.462321	1.01711	11.0957	85.4369	22.4978	68.5379	26.98	78.0178	15.778	6.20416	60.6832	22.0242	17.2926
808	0.305577	0.0763942	1.3751	0.0763942	2.21543	95.9511	9.09091	39.4194	20.6264	93.7479	2.73116	3.5209	84.0711	7.11176	8.81713	1.47913	0.264131	0.0528262	0.369783	2.37718	95.4569	17.3485	65.2512	21.9057	86.3413	10.2953	3.36341	73.3803	17.3709	9.24883
809	2.977	0.270636	0.811908	0.135318	3.24763	92.5575	23.7483	29.364	38.8363	91.6249	4.50614	3.86891	73.862	11.8943	14.2438	2.0339	0.0677966	0.135593	1.42373	6.0339	90.3051	31.3492	71.2963	39.7487	80.9033	14.7756	4.32116	60.0382	27.3942	12.5676
810	4.58269	2.61235	1.19548	4.18419	41.9526	45.4727	55.3907	79.8317	71.4412	67.235	14.8186	17.9464	44.6181	20.2059	35.176	7.02353	1.39789	0.528469	13.5527	48.2782	29.2192	60.3326	87.1973	70.9719	48.5325	27.4184	24.049	29.9241	32.277	37.7989
811	0.449583	0.0642261	1.15607	0.32113	1.92678	96.0822	9.95504	24.8555	16.4419	93.8422	2.69403	3.46376	79.2129	8.64447	12.1426	1.62999	0.244499	0.244499	1.30399	1.87449	94.7025	19.0135	50.4375	8.67144	83.6895	13.4259	2.88462	67.2339	21.3296	11.4365
812	0.828157	0.414079	0.966184	0.207039	5.10697	92.4776	6.55625	11.2491	17.2533	90.2934	4.96197	4.74466	79.9049	8.87832	11.2168	1.5736	0.101523	0.304569	0.862944	10.3046	86.8528	20.597	63.1343	28.1095	71.9932	21.1759	6.83093	61.36	25.5403	13.0996
813	0.494827	1.07962	1.30454	0.0899685	3.77868	93.2524	8.09717	31.1291	19.883	86.4324	5.97853	7.58907	72.0979	11.5293	16.3727	1.74382	0.317058	0.285352	0.792644	7.60938	89.2517	16.3164	59.8269	25.4944	73.2777	20.1635	6.5588	55.5168	28.4468	16.0365
901	1.16656	0.194426	1.87946	0.129618	6.54569	90.0843	6.6105	44.3292	0	83.6806	8.23413	8.08532	74.4144	12.8529	12.7327	2.84024	0.236686	0.35503	3.13609	13.1953	80.2367	14.2604	81.3018	8.40237	59.751	28.5892	11.6598	54.8829	29.8719	15.2452
902	11.56	0.261878	1.72091	0.673401	9.80172	75.982	6.13543	70.9315	17.8077	76.7311	11.8914	11.3775	63.4638	16.5596	19.9766	11.4102	0.214133	0.122362	6.11808	16.58	65.5552	12.5421	92.5665	23.4322	51.9751	33.8046	14.2204	37.8193	39.7354	22.4453
903	71.1078	0.149701	1.57186	0.898204	1.79641	24.476	5.46407	66.1677	0	84.5272	6.87679	8.59599	71.7362	12.8533	15.4105	56.2953	0.197759	0	1.97759	4.08701	37.4423	10.4812	93.3421	7.58075	62.3681	30.0597	7.57228	43.1922	41.9908	14.8169
904	14.1704	0.453858	1.5885	1.89107	20.474	61.4221	16.3137	69.9445	25.5421	76.2648	11.9744	11.7608	63.2332	16.8356	19.9312	17.6907	0.28866	0.371134	8.74227	20.5773	52.3299	20.2474	89.9381	35.6495	52.514	30.7112	16.7749	38.9602	38.2616	22.7782
905	10.3507	0.0855432	2.22412	0.0855432	3.33618	83.9179	3.59281	46.7066	11.4628	91.4477	5.04894	3.50335	80.3279	9.83607	9.83607	10.2175	0	0.0659196	2.17535	6.85564	80.6856	15.1615	90.5735	11.9314	71.2614	21.9332	6.80537	54.7581	32.1106	13.1313
906	21.3597	0.321199	1.98073	0.347966	11.8576	64.1328	12.152	51.1242	23.394	88.5066	6.42202	5.07136	73.8021	13.6059	12.592	21.3851	0.142161	0.203087	2.70106	16.2063	59.3623	21.1617	84.8091	25.7108	69.7388	23.2919	6.96932	48.6426	35.3891	15.9683
1001	1.60154	0.544523	1.60154	1.56951	28.5074	66.1755	23.1903	69.2505	35.8744	77.6794	9.95571	12.3649	63.2249	14.71	22.0651	3.00169	0.387315	0.338901	7.81893	27.5962	60.8569	32.0504	85.5725	32.7039	62.5828	22.9681	14.4491	44.3602	29.763	25.8768
1002	1.05519	0.162338	1.37987	0.487013	5.27597	91.6396	13.5552	84.4156	0	83.418	9.09931	7.48268	68.6446	14.6015	16.7539	2.50494	0.395517	0.197759	1.64799	10.8767	84.3771	19.5781	91.826	0	60.0323	29.2289	10.7388	45.2794	35.4046	19.316
1003	1.08268	0.590551	1.1811	0.0984252	8.66142	88.3858	9.64567	83.8583	15.5512	83.2287	8.78924	7.98206	73.3801	11.4471	15.1728	3.83877	0.447857	0.0639795	1.72745	13.3717	80.5502	21.4971	93.3461	14.5873	65.1239	26.4213	8.45481	54.4232	29.8818	15.6951
1004	0.661765	0.0735294	1.69118	0.220588	7.79412	89.5588	10.2206	75	17.7941	84.1169	8.02055	7.8625	72.1295	13.4041	14.4664	2.46168	0.232234	0.13934	3.06549	13.2838	80.8175	19.647	87.9703	18.8574	63.9899	28.6794	7.33072	46.0444	37.6128	16.3428
1005	1.13895	0.379651	1.21488	0.531511	11.4655	85.2696	18.2232	83.1435	15.6416	74.9574	11.9676	13.075	61.4357	18.197	20.3673	1.55782	0.239664	0	1.8574	18.2145	78.1306	34.3319	94.9071	16.3571	55.9654	31.6899	12.3447	42.7955	36.9284	20.2761
